# Supplementary material for: IL-17 producing mast cells promote the expansion of myeloid-derived suppressor cells in a mouse allergy model of colorectal cancer
Source: PubMed Central journal article supplement (PMC4741743; doi:10.18632/oncotarget.5435), 2015-09-26
Supplement: oncotarget-06-32966-s001.pdf [file oncotarget-06-32966-s001.pdf]

SUPPLEMENTARY FIGURES AND TABLE

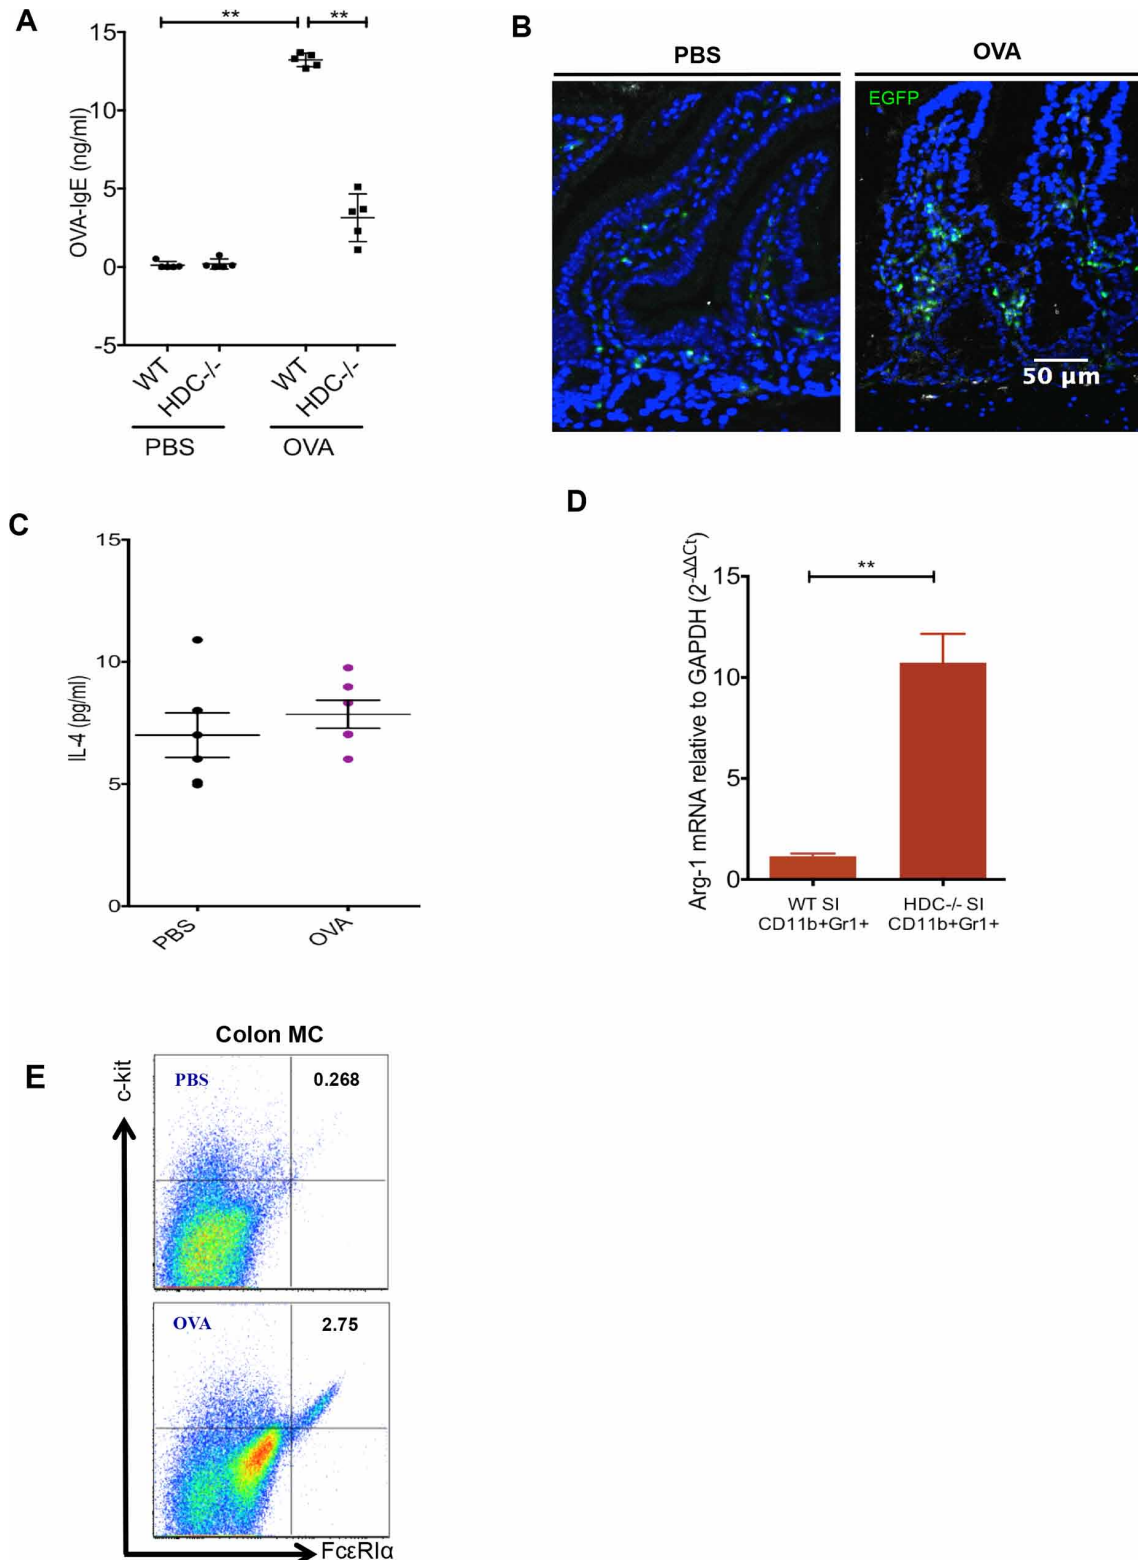

**Supplementary Figure S1: Accumulation of MCs and Arg-1 hi HDC-expressed myeloid cells in HDC<sup>-/-</sup> OVA intestinal allergy.** **A.** Serum OVA IgE levels in HDC<sup>-/-</sup> and WT mice. **B.** Accumulation of HDC<sup>+</sup> cells in OVA treated HDC<sup>-/-</sup> mice small intestine. **C.** No elevation of serum IL-4 in HDC<sup>-/-</sup> OVA allergy mice compared to PBS controls. **D.** OVA allergy HDC<sup>-/-</sup> mice intestinal CD11b+Gr1<sup>+</sup> cells express higher Arg-1 gene compared to WT controls. **E.** Increase of colon MCs in HDC<sup>-/-</sup> OVA allergy.

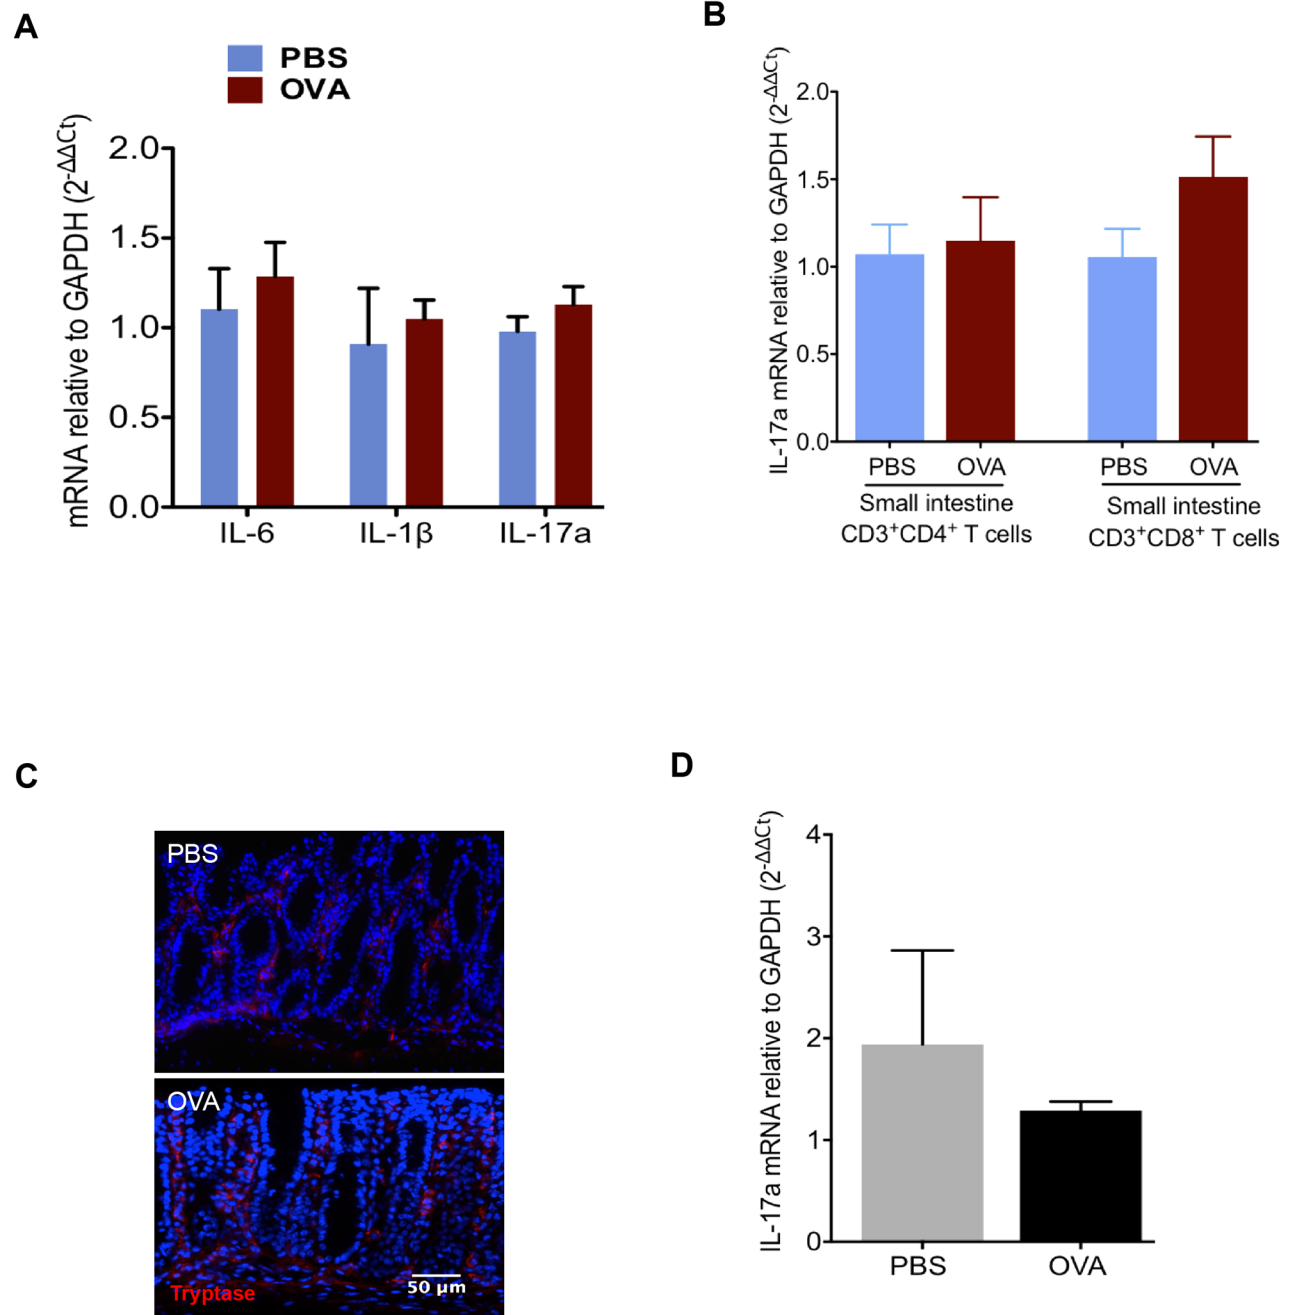

**Supplementary Figure S2: MC is the IL-17 producing cell in *HDC*<sup>-/-</sup> OVA allergy mice intestine.** **A.** Expression of IL-6, IL-1 $\beta$ , and IL-17 in WT colon MCs, compared PBS and OVA treatment. **B.** IL-17a mRNA levels in sorted CD3<sup>+</sup>CD4<sup>+</sup> or CD3<sup>+</sup>CD8<sup>+</sup> from PBS or OVA treated *HDC*<sup>-/-</sup> mice small colon. **C.** Tryptase staining on colon frozen sections from WT mice treated with PBS or OVA. **D.** IL-17a mRNA expression in WT colon MCs, compared OVA and PBS treatments.



**Supplementary Table S1: Sequences of SYBR green qRT-PCR primers used in this study**

| Gene          | Forward                   | Reverse                   |
|---------------|---------------------------|---------------------------|
| IL-1 $\beta$  | CGGACCCCAAAAGATGAAG       | TTCTCCACAGCCACAATGAG      |
| IL-23a        | CCCGTATCCAGTGTGAAGATG     | GGCTCCCCTTTGAAGATGTC      |
| IL-6          | CAAAGCCAGAGTCCTTCAGAG     | GTCCTTAGCCACTCCTTCTG      |
| INF- $\gamma$ | GGCCATCAGCAACATAAGCGT     | TGGGTTGTTGACCTCAAACCTTGGC |
| IL-12p40      | ACCTGTGACACGCCTGAAGAAGAT  | TCTTGTGGAGCAGCAGATGTGAGT  |
| TNF- $\alpha$ | TTCATGCACCACCATCAAGGACT   | ACCACTCTCCCTTTGCAGAACTCA  |
| IL-4          | AGCCATATCCACGGATGCGACAAA  | AATATGCGAAGCACCTTGAAGCC   |
| IL-5          | TGCATCAGGGTCTCAAGTATTC    | GGATGCTAAGGTTGGGTATGT     |
| IL-10         | AGCCGGAAGACAATAACTG       | GGAGTCGGTTAGCAGTATGTTG    |
| IL-13         | CAGCCCTCAGCCATGAAATA      | CTTGAGTGTAACAGGCCATTCT    |
| TGF- $\beta$  | GTGCGGCAGCTGTA-CATTGACTTT | TGTAAGTGGTAACCGCTCAGGTGT  |
| Cox-2         | AGTGTGCGACATACTCAAGCAGGA  | TTGAAGTGGTAACCGCTCAGGTGT  |
| Arg-1         | AAGAATGGAAGAGTCAGTGTGG    | GGGAGTGTTGATGTCAGTGTG     |
| GAPDH         | CTTTGTCAAGCTCATTTCCTGG    | TCTTGCTCAGTGTCTTGC        |
